# Supplementary material
Source: MDPI journal article supplement (https://www.mdpi.com/2221-3759/10/4/45)
Supplement: s1 [file s1]

# Supplementary Materials

## Involvement of a Basic Helix-Loop-Helix Gene *BHLHE40* in Specification of Chicken Retinal Pigment Epithelium

Toshiki Kinuhata <sup>1, †</sup>, Keita Sato <sup>2, †</sup>, Tetsuya Bando <sup>2</sup>, Taro Mito <sup>3</sup>, Satoru Miyaishi <sup>4</sup>, Tsutomu Nohno <sup>5</sup> and Hideyo Ohuchi <sup>2,\*</sup>

<sup>1</sup> Department of Cytology and Histology, Okayama University Graduate School of Medicine, Dentistry and Pharmaceutical Sciences, 2-5-1 Shikata-cho, Kita-ku, Okayama 700-8558, Japan

<sup>2</sup> Department of Cytology and Histology, Okayama University Faculty of Medicine, Dentistry and Pharmaceutical Sciences, 2-5-1 Shikata-cho, Kita-ku, 2 Okayama 700-8558, Japan

<sup>3</sup> Bio-Innovation Research Center, Tokushima University, 2272-2 Ishii, Ishii-cho, Myozai-gun, Tokushima 779-3233, Japan

<sup>4</sup> Department of Legal Medicine, Okayama University Faculty of Medicine, Dentistry and Pharmaceutical Sciences, 2-5-1 Shikata-cho, Kita-ku, Okayama 700-8558, Japan

<sup>5</sup> Department of Cytology and Histology, Okayama University Medical School, 2-5-1 Shikata-cho, Kita-ku, Okayama 700-8558, Japan

\* Correspondence: ohuchi-hideyo@okayama-u.ac.jp

† These authors contributed equally to this work.

**Figure S1**

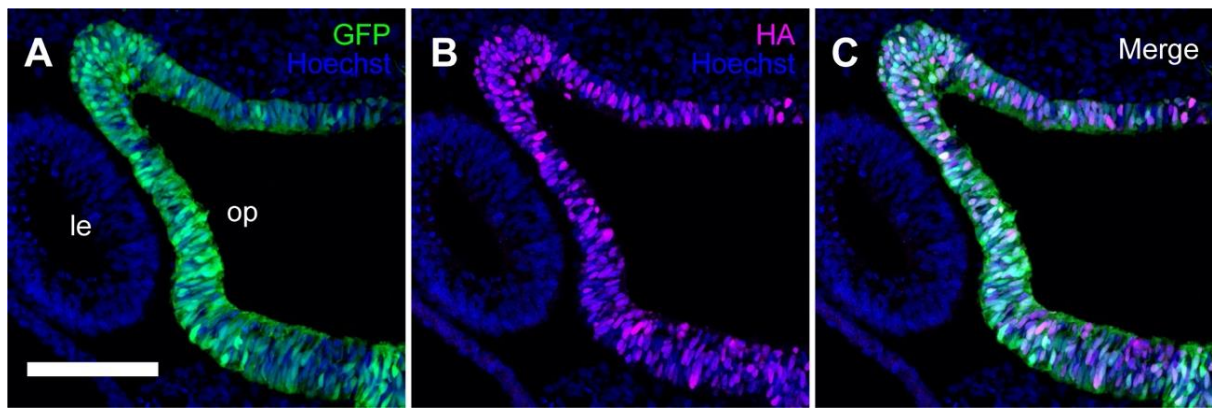

**Figure S1 (data related to Figures 2 and 3):** In the optic cup after *BHLHE40-HA* overexpression (from embryo #17, same as shown in Figure 3I-N), co-electroporated GFP fluorescence (**A**) is overlapped with BHLHE40-HA protein localization (**B**). Merged image of (**A**) and (**B**) is shown in (**C**). Cell nuclei were stained with Hoechst 33342. Shown images are maximum intensity projections of confocal z-series. le, lens vesicle; op, optic cup. Scale bar: 100  $\mu$ m in (**A**) for (**A-C**).

**Figure S2**

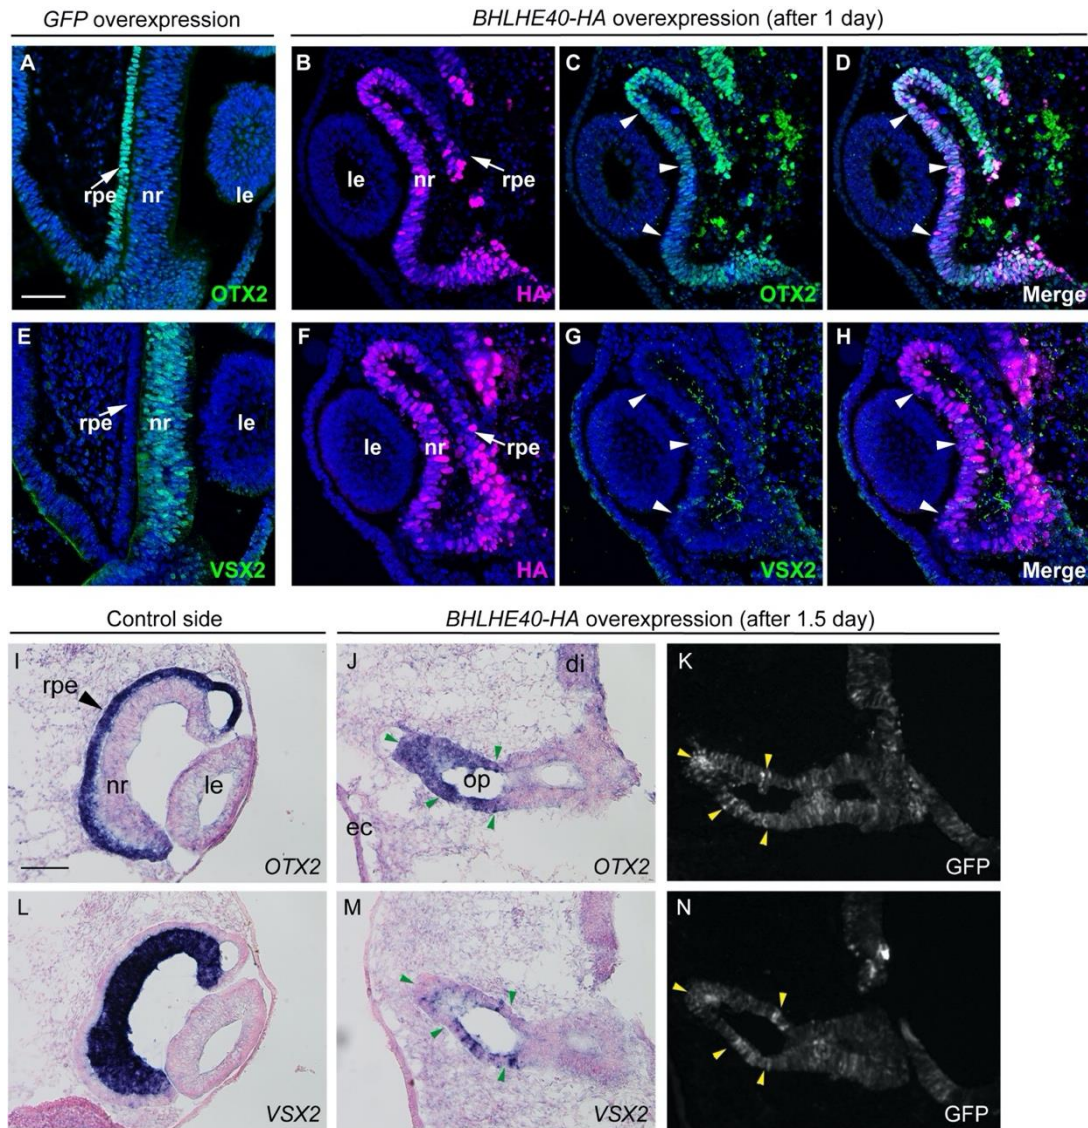

**Figure S2 (data related to Figure 3):** Similar data of Figure 3 from other embryos, except for those after GFP expression (A, E), which are identical images as shown in Figure 3A and E. Frontal sections of the optic cup from three embryos (*GFP*#2, *BHLHE40*#11, *BHLHE40*#22) are shown. Dorsal is to the up. (A-H) Optic cups at 1 day post electroporation (for *GFP* alone and HA-tagged *BHLHE40* overexpression). In embryo #11 after *BHLHE40* overexpression, OTX2 protein is localized to the inner layer of the OC (arrowheads in C, D), where VSX2 protein is not detected (arrowheads in G, H). Cell nuclei were stained with Hoechst 33342. Shown images are maximum intensity projections of confocal z-series. (I-N) Optic cups at one and half day post electroporation (HA-tagged *BHLHE40* overexpression). (I, L) Optic cups on the control side are shown. In (K, N), co-electroporated *GFP*, showing the domain of *BHLHE40* overexpression. (J, M) In embryo #22, optic cup development is disrupted and there is no lens formation after *BHLHE40* overexpression. OTX2 is expressed in the distal portion of the optic cup (J), where *BHLHE40* is ectopically expressed (arrowheads in J, K). In the same domain, VSX2 expression is downregulated but remains in some cells (arrowheads in M, N). Cell nuclei were stained with nuclear fast red. di, diencephalon; ec, surface ectoderm; le, lens vesicle; nr, neural retina; op, optic cup or deformed optic vesicle in (J-N); rpe, developing RPE. Scale bar: 50  $\mu$ m in (A) for (A-H), 100  $\mu$ m in (I) for (I-N).

Figure S3

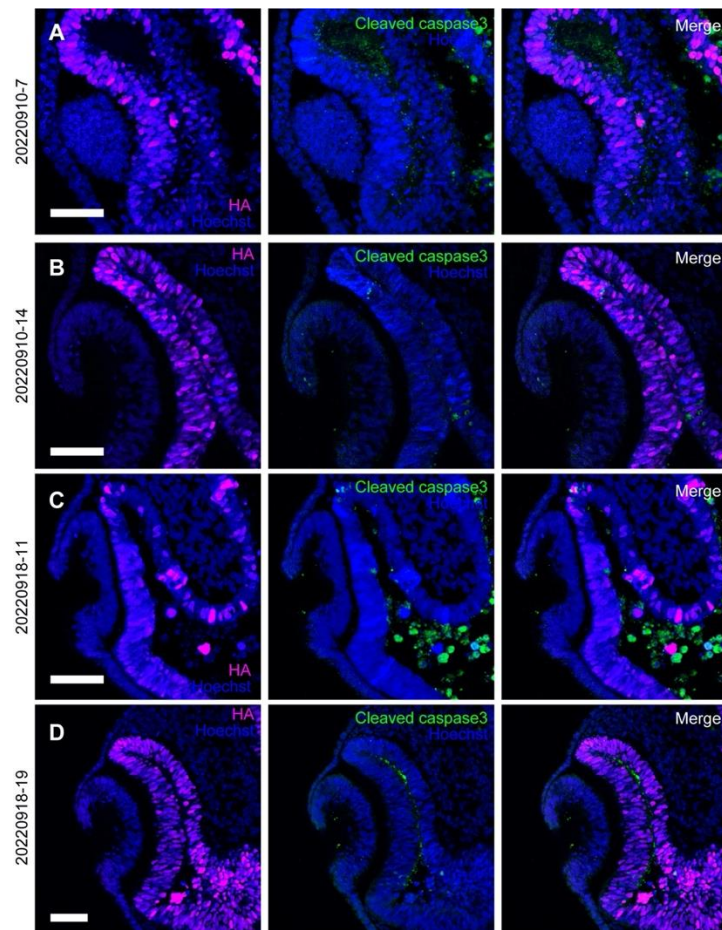

**Figure S3: *BHLHE40*-HA expressing cells do not show cell death as revealed by immunofluorescence using anti-cleaved caspase 3.** In four embryos examined (A-D) (embryo identification numbers are shown on the leftmost), none of the HA-immunoreactive cells are positive for cleaved caspase 3. Cell nuclei were stained with Hoechst 33342. Shown images are maximum intensity projections of confocal z-series. Scale bar: 50  $\mu$ m in (A-D) for all images.



Figure S4

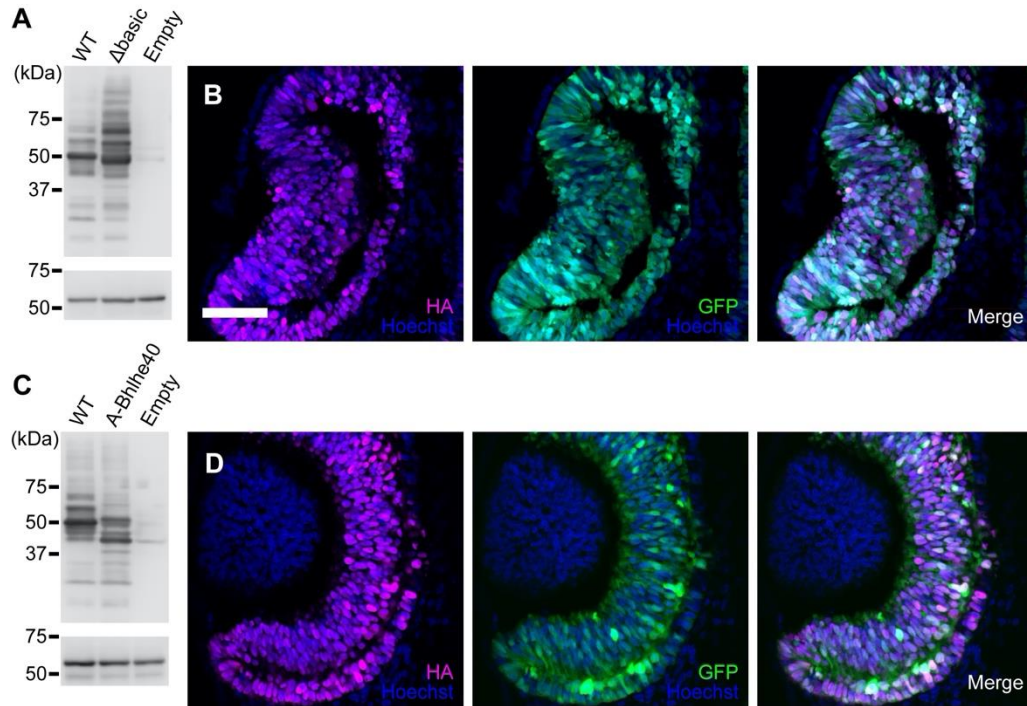

**Figure S4: Validation of expression of HA-tagged presumed dominant negative forms of BHLHE40.** (A, C) Western blot analysis of HEK293T cells transfected with chicken  $\Delta$ basic *BHLHE40*-HA/pCAGGS (A) or  $\Delta$ basic with acidic extension *BHLHE40*-HA (C) vectors. Alpha tubulin from the same samples was detected for loading reference. (B, D) Confocal microscopic images show that HA-tagged presumed dominant negative forms of BHLHE40 are detected all over the optic cup by immunofluorescence using the anti-HA antibody. Secondary antibody to anti-HA was Alexa Fluor 568-conjugated anti-rat IgG. Co-electroporated GFP and merged images are shown in the middle and right panels, respectively. Cell nuclei were stained with Hoechst 33342. Shown confocal images are maximum intensity projections of z-series. Scale bar: 50  $\mu$ m in (B) for all confocal images.

**Figure S5**

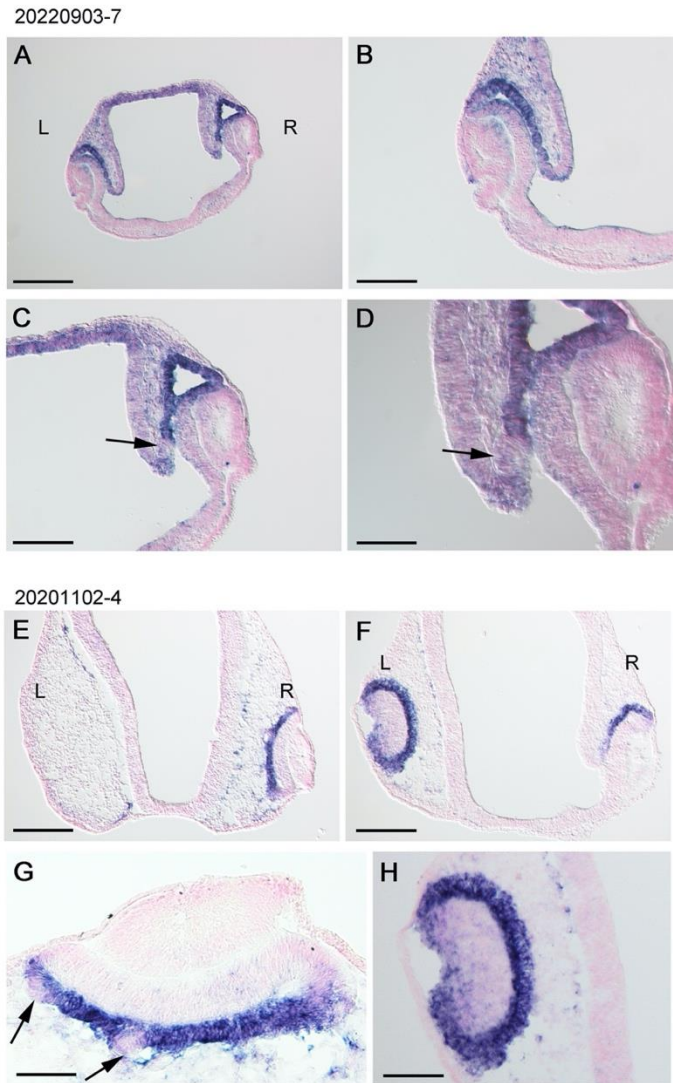

**Figure S5 (data related to Figure 4):** In situ hybridization (ISH) on the frontal section of the chicken embryonic head after 1 day post electroporation (embryo #7 for **A-D** and #4 for **E-H**). Enlarged view of the optic cup (OC) in (**A**) on the left (L) control side is shown in (**B**), and that of the right (R) *Lhx1*-overexpressed one is shown in (**C, D**). *BHLHE40* expression is downregulated in a portion of the outer layer of the OC (arrows in **C, D**). In embryo #4, the head sections were cut oblique and the left control OC is not seen in (**A**). Enlarged view of the right OC is shown in (**G**) and that of the left control OC is shown in (**H**). *BHLHE40* expression is downregulated in two portions of the outer layer of the OC (arrows in **G**). Cell nuclei were stained with nuclear fast red. Scale bars: 200  $\mu\text{m}$  (**A, E, F**), 100  $\mu\text{m}$  (**B, C, H**), 70  $\mu\text{m}$  (**G**), 50  $\mu\text{m}$  (**D**).

Figure S6

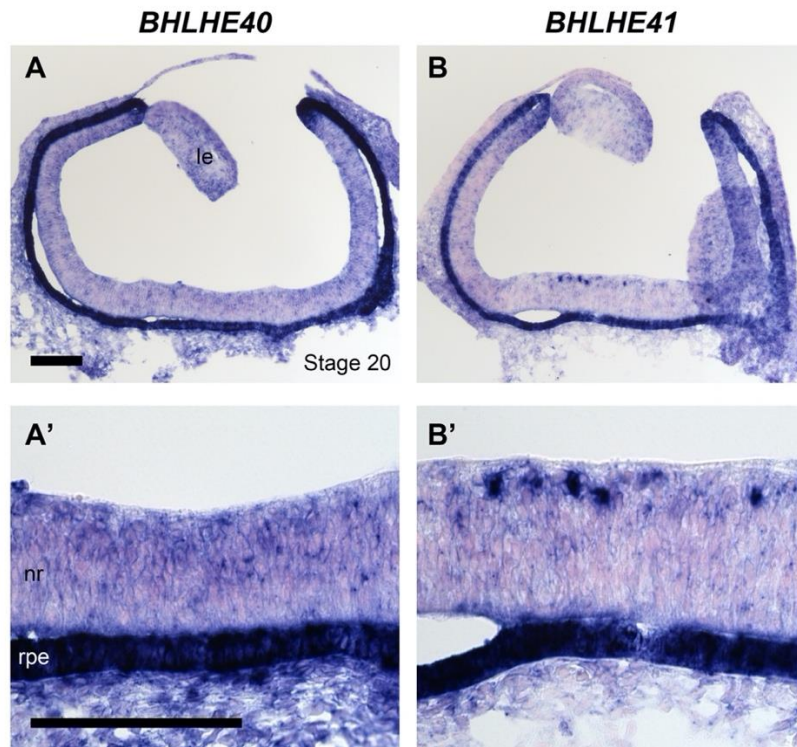

**Figure S6: Expression patterns of *BHLHE40* (A,A') and *BHLHE41* (B,B') in the developing chicken eye at stage 20. *BHLHE41* is expressed by developing retinal ganglion cells at the central retina in addition to the developing RPE and ciliary marginal zone. le, lens vesicle; nr, neural retina; rpe, developing RPE. Scale bars: 100  $\mu$ m.**



**Figure S7**

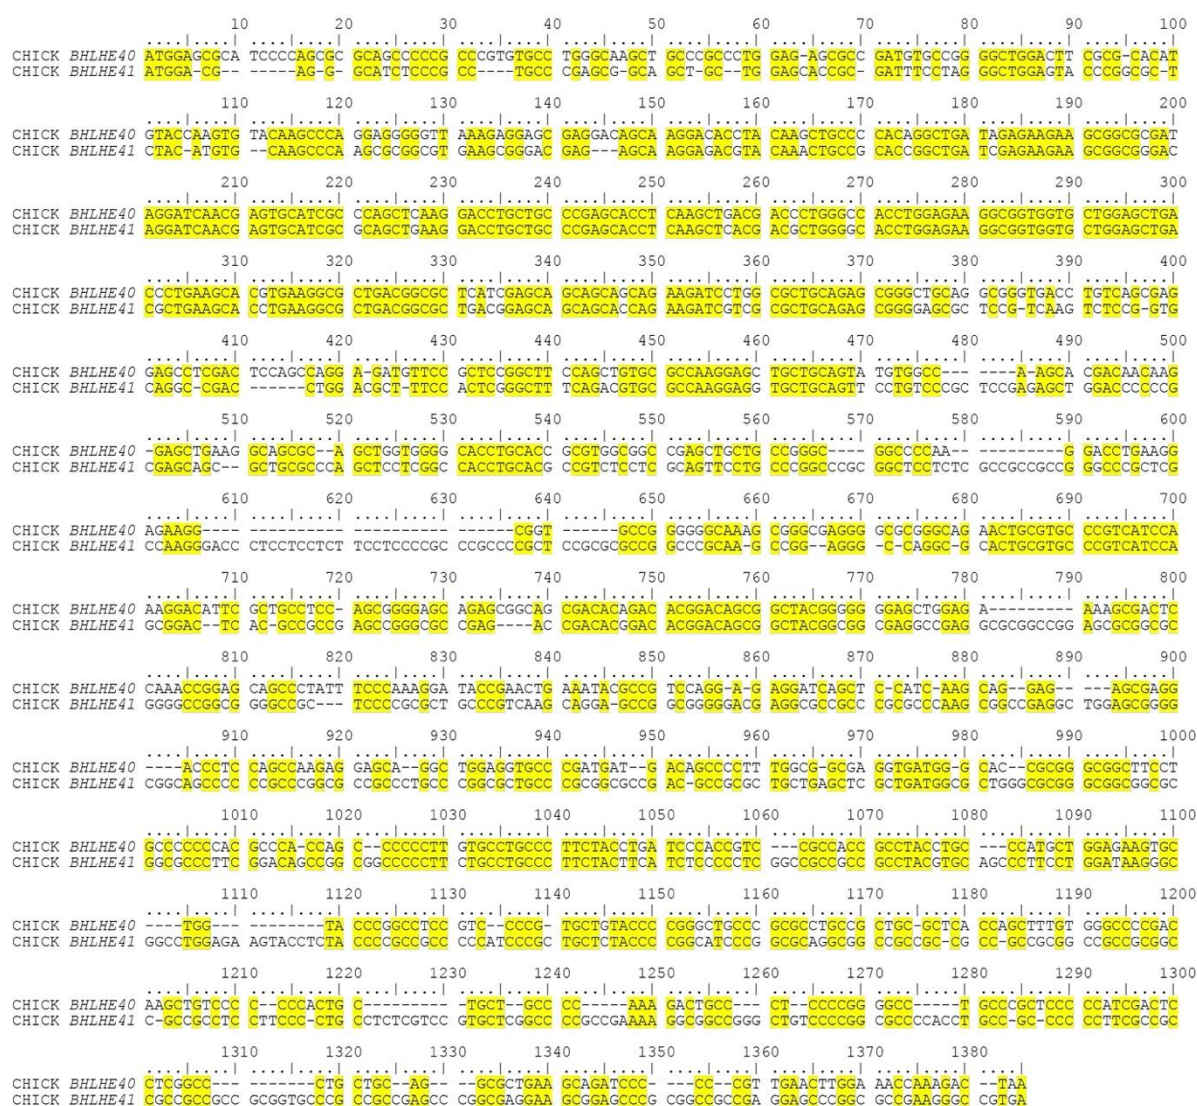

**Figure S7: Alignment of coding DNA sequences for chicken BHLHE40 and BHLHE41.** The nucleotide identity is 63%. Identical nucleotides are highlighted in yellow.



Figure S8

|                                             |                   | 10                | 20                | 30               | 40                 | 50                  | 60                 | 70                | 80                | 90                | 100 |
|---------------------------------------------|-------------------|-------------------|-------------------|------------------|--------------------|---------------------|--------------------|-------------------|-------------------|-------------------|-----|
| CHICK BHLHE40                               | M-ERIPSAQP        | PPVCLGKLPA        | LESADVPGLD        | FAHMYQVYKP       | RRGLKRSSEDS        | KD <b>TYKLPHRL</b>  | <b>IEKKRRDRIN</b>  | <b>ECIAQLKDLL</b> | <b>PEHLKLTTLG</b> | <b>H--LEKAVVI</b> |     |
| HUMAN BHLHE40                               | M-ERIPSAQP        | PPACLCPKAPG       | LEHGDLPGMY        | PAHMYQVYKS       | RRGFKRSSEDS        | KET <b>TYKLPHRL</b> | <b>IEKKRRDRIN</b>  | <b>ECIAQLKDLL</b> | <b>PEHLKLTTLG</b> | <b>H--LEKAVVI</b> |     |
| MOUSE BHLHE40                               | M-ERIPSAQP        | PPTCLCPKAPG       | LEHGDLSGMD        | FAHMYQVYKS       | RRGFKRSSEDS        | KET <b>TYKLPHRL</b> | <b>IEKKRRDRIN</b>  | <b>ECIAQLKDLL</b> | <b>PEHLKLTTLG</b> | <b>H--LEKAVVI</b> |     |
| DANRE BHLHE40                               | M-ERITSAQP        | PP-CMSKHPS        | LDISDMQMGD        | FP-MY-VYKP       | RRGMKRSSEDS        | KD <b>TYKLPHRL</b>  | <b>IEKKRRDRIN</b>  | <b>ECIAQLKDLL</b> | <b>PEHLKLTTLG</b> | <b>H--LEKAVVI</b> |     |
| CHICK BHLHE41                               | MDEGISRLPE        | RQ-----L          | LEHRDFLGL         | YPALY-MCKP       | KRGVKR-DES         | KET <b>TYKLPHRL</b> | <b>IEKKRRDRIN</b>  | <b>ECIAQLKDLL</b> | <b>PEHLKLTTLG</b> | <b>H--LEKAVVI</b> |     |
| HUMAN BHLHE41                               | MDEGIPHLQE        | RQ-----L          | LEHRDFIGLD        | YSSLY-MCKP       | KRSMKR-DDT         | KD <b>TYKLPHRL</b>  | <b>IEKKRRDRIN</b>  | <b>ECIAQLKDLL</b> | <b>PEHLKLTTLG</b> | <b>H--LEKAVVI</b> |     |
| MOUSE BHLHE41                               | MDEGIPHLQE        | RQ-----L          | LEHRDFIGLD        | YSSLY-MCKP       | KRSLKR-DDT         | KD <b>TYKLPHRL</b>  | <b>IEKKRRDRIN</b>  | <b>ECIAQLKDLL</b> | <b>PEHLKLTTLG</b> | <b>H--LEKAVVI</b> |     |
| DANRE BHLHE41                               | MEERISRMQN        | RQ-----F          | LDHADFLGVE        | YSSLY-MCKS       | KRGMKR-EEG         | KD <b>AYKLPHRL</b>  | <b>IEKKRRDRIN</b>  | <b>ECIGQLKDLL</b> | <b>PEHLKLTTLG</b> | <b>H--LEKAVVI</b> |     |
| <b>basic helix-loop-helix (bHLH) domain</b> |                   |                   |                   |                  |                    |                     |                    |                   |                   |                   |     |
|                                             |                   | 110               | 120               | 130              | 140                | 150                 | 160                | 170               | 180               | 190               | 200 |
| CHICK BHLHE40                               | <b>ELTLKHVKAL</b> | TALIEQQQQK        | ILALQSGLQA        | GDLARSRLDS       | SQEM <b>FRSGGQ</b> | <b>LCAKELLQYV</b>   | <b>AKHD--N-KE</b>  | <b>LKAAQLVGH</b>  | HRVAEELLPG        | G-----            |     |
| HUMAN BHLHE40                               | <b>ELTLKHVKAL</b> | TNLIDQQQQK        | IIALQSGLQA        | GELSGRNVET       | GQEM <b>FCSGGQ</b> | <b>TCAREVLQYL</b>   | <b>AKHE--NTRD</b>  | <b>LKSSQLVTHL</b> | HRVVSSELLQG       | G-----T           |     |
| MOUSE BHLHE40                               | <b>ELTLKHVKAL</b> | TNLIDQQQQK        | IIALQSGLQA        | GDLSGRNLEA       | GQEM <b>FCSGGQ</b> | <b>TCAREVLQYL</b>   | <b>AKHE--NTRD</b>  | <b>LKSSQLVTHL</b> | HRVVSSELLQG       | G-----A           |     |
| DANRE BHLHE40                               | <b>ELTLKHVKAL</b> | NNLLEQQQQK        | IISLQNLQI         | GEQGNPSEN        | SEEM <b>FRSGFH</b> | <b>LCAKEVLQFL</b>   | <b>ANQE--TMRD</b>  | <b>LTTAHIEHL</b>  | QKVASELIQS        | P-----P           |     |
| CHICK BHLHE41                               | <b>ELTLKHLKAL</b> | TALTEQQHQK        | IIVALQSGERS       | VK---SPVQA       | DLDA <b>FHSGGQ</b> | <b>TCAKEVLQFL</b>   | <b>SRSESWTPRE</b>  | <b>QRCACLGLH</b>  | HAVSSQFLPG        | PRLLSPPPPG        |     |
| HUMAN BHLHE41                               | <b>ELTLKHLKAL</b> | TALTEQQHQK        | IIVALQNGERS       | LK---SPIQS       | DLDA <b>FHSGGQ</b> | <b>TCAKEVLQYL</b>   | <b>SRFESWTPRE</b>  | <b>PRCQQLINHL</b> | HAVATQFLPT        | PQLLTQQV-P        |     |
| MOUSE BHLHE41                               | <b>ELTLKHLKAL</b> | TALTEQQHQK        | IIVALQNGERS       | LK---SPVQA       | DLDA <b>FHSGGQ</b> | <b>TCAKEVLQYL</b>   | <b>ARFESWTPRE</b>  | <b>PRCQQLVSHL</b> | HAVATQLL-T        | PQV-----P         |     |
| DANRE BHLHE41                               | <b>ELTLKHLNAL</b> | TAVTEQQHQK        | IIVALQNGERS       | LK---SSLQA       | DLDA <b>FHSGGQ</b> | <b>ACAKEVLQYL</b>   | <b>NKVENNWTARE</b> | <b>QRCTRILNHL</b> | HKVSAQFQPG        | TGILQQ----        |     |
| <b>Orange domain</b>                        |                   |                   |                   |                  |                    |                     |                    |                   |                   |                   |     |
|                                             |                   | 210               | 220               | 230              | 240                | 250                 | 260                | 270               | 280               | 290               | 300 |
| CHICK BHLHE40                               | -----PK           | DLKEKAVPG-        | --GKAGEGRG        | QNCVPIQRT        | FAASSGQSGG         | SDTDTDSGYG          | GELEKSDSKP         | EQP--YFPKD        | TELKYAVQER        | ISSIKQE--S        |     |
| HUMAN BHLHE40                               | SRKPSDPAKP        | VMDKEKPPS         | P-AKGSEGGP        | KNCVPIQRT        | FAHSSGQSGG         | SDTDTDSGYG          | GESEKGLDLS         | EQP--CFKSD        | HGRFFTMGER        | IGAIKQE--S        |     |
| MOUSE BHLHE40                               | SRKPLDSAPK        | AVDLKEKPSF        | L-AKGSEGGP        | KNCVPIQRT        | FAPSGGEQSG         | SDTDTDSGYG          | GELEKGLDLS         | EQP--YFKSD        | HGRFFAVGER        | VSTIKQE--S        |     |
| DANRE BHLHE40                               | SPRLDEPAK         | AQESREKPSG        | LQPKAAEGHA        | KNCVPIQRT        | YPHSS-EQSG         | SDTDTDSGYG          | GEYEKRDQKA         | QRPDCYVKES        | GALKYS----        | --SIIKEE--Q       |     |
| CHICK BHLHE41                               | LAKG----PS        | SSSSPPAP-L        | RAPARKPEGQ        | AHCVPVIQRT       | H-AAE-PGAE         | TDTDTSYG            | GEAEARPERG         | AGP-----          | -----AGPLP        | ALPVLQEPAG        |     |
| HUMAN BHLHE41                               | LSKGTG-APS        | AAGSAAAPCL        | ERAGQKLEPL        | AYCVPVIQRT       | QPSAE-LAAE         | NDTDTDSYG           | GEAEARPDRE         | KGK-----          | -----GAGAS        | RVTIKQEPFG        |     |
| MOUSE BHLHE41                               | SGRSGRAPC         | SAGAAAA--         | -----GPERV        | ARCVPVIQRT       | QPGTE---PE         | HTDTSYG             | GEAEQG----         | -----             | -----             | RAAVKQEPFG        |     |
| DANRE BHLHE41                               | -----PV           | AGDDAPER--        | ---DTQRDPQ        | ANCVPIQRT        | Q---NLELNE         | NDTDTDSYG           | GEAEKGDGKS         | EKG-----          | -----CDTAK        | GVKIKQE-FG        |     |
|                                             |                   | 310               | 320               | 330              | 340                | 350                 | 360                | 370               | 380               | 390               | 400 |
| CHICK BHLHE40                               | EDPPAKRSRL        | EVPDDD----        | -----             | -----            | -----              | -----SPFG           | GEVMGTAGGF         | LPPHAHQPL         | CLPFYLIPPS        | AT-AYL-PM-        |     |
| HUMAN BHLHE40                               | EEPTTKNRM         | QLSDDE----        | -----             | -----            | -----              | -----GHFTS          | SDLIS--SPF         | LGPHPHQPF         | CLPFYLIPPS        | AT-AYL-PM-        |     |
| MOUSE BHLHE40                               | EEPTTKSRM         | QLSEEE----        | -----             | -----            | -----              | -----GHFAG          | SDLMG--SPF         | LGPHPHQPF         | CLPFYLIPPS        | AT-AYL-PM-        |     |
| DANRE BHLHE40                               | DEPPSKRPRS        | DSSEDE----        | -----             | -----            | -----              | -----SLSG           | HDVVGHSFY          | VSFSPQP-PL        | CMPFYLFPPG        | AAAAYL-PM-        |     |
| CHICK BHLHE41                               | DEAPPAPKRP        | RLERGG----        | -----             | -----SPPPG       | AALPGAARGA         | DAALLSSILMA         | LGAGGGAAPF         | GQP---AAPF        | CLPFYFISPS        | AAAAYVQPF         |     |
| HUMAN BHLHE41                               | EDSP-APKRM        | KLDSRGGGSG        | GGPGGAAAA         | AAALLGPDPA       | AA--AALLRP         | DAALLSSSLVA         | FGGGG--APF         | PQPAAPAAAPF       | CLPFCELSPS        | AAAAYVQPF         |     |
| MOUSE BHLHE41                               | DSSP-APKRP        | KLEARG----        | -----             | -----            | -----ALLGP         | EPALLGSLVA          | LGGG---APF         | AQP---AAPF        | CLPFYLLSPS        | AA-AVYQFWL        |     |
| DANRE BHLHE41                               | DERVTKAKM         | NWSANG----        | -----             | -----GSDST       | ST-----RP          | DVALMNSLMG          | MTGVGG----         | -----QQTFF        | CMPFYFINPS        | AAAASYM-PLF       |     |
|                                             |                   | 410               | 420               | 430              | 440                | 450                 | 460                | 470               | 480               | 490               | 500 |
| CHICK BHLHE40                               | ----LEKCYW        | PAS-----          | VPVLYPGLP         | -----AP          | AAALTSFVGP         | DKLSPPLLLP          | QRLSPGPA-          | -----             | ---RSPIDSS        | ALLQALKQIP        |     |
| HUMAN BHLHE40                               | ----LEKCYW        | PTS-----          | VPVLYPGLN         | -----AS          | AAALSSFMNP         | DKISAPLLMP          | QRLSPPLPA-         | -----             | ---HPSVDSS        | VLLQALKQIP        |     |
| MOUSE BHLHE40                               | ----LEKCYW        | PTS-----          | VPVLYPGLN         | -----TS          | AAALSSFMNP         | DKIPTPLLLP          | QRLSPPLA-          | -----             | ---HSSLDSS        | ALLQALKQIP        |     |
| DANRE BHLHE40                               | ----LEKCYW        | PGA-----          | MPVLYPGLG         | -----SS          | PASLS---P          | EKLPSMVMMS          | SRVGSVPST-         | -----             | ---PTSMDSP        | ALLQALKQVP        |     |
| CHICK BHLHE41                               | <b>DKGGLEKLYL</b> | <b>PAA-----</b>   | <b>PIPLLYPGIP</b> | <b>--AQAAAAA</b> | <b>AAAAAAAF</b>    | <b>CLSSVLGPA-</b>   | <b>EKAAGLSAP</b>   | <b>HLP-----</b>   | <b>---PFAAAA</b>  | <b>AAVPAEPGE</b>  |     |
| HUMAN BHLHE41                               | <b>DKSGLEKLYL</b> | <b>PAAAAA----</b> | <b>PFPLLYPGIP</b> | <b>APAAAAAA</b>  | <b>AAAAAAAF</b>    | <b>CLSSVLSPPP</b>   | <b>EKAGA-AAAT</b>  | <b>LLPHEVAPLG</b> | <b>APHQPHPHGR</b> | <b>THLPFAGPGE</b> |     |
| MOUSE BHLHE41                               | <b>DKSGLDKLYL</b> | <b>PAAAAA----</b> | <b>PFPLLYPGIP</b> | <b>-----AA</b>   | <b>AAAAAAAF</b>    | <b>CLSSVLSPPP</b>   | <b>EKAGATAGAP</b>  | <b>FLAHEVAPPG</b> | <b>PLRPQHAHSR</b> | <b>THLPRA----</b> |     |
| DANRE BHLHE41                               | <b>DKSHLEKLYL</b> | <b>PAAAAAALT</b>  | <b>PFPLLYPGIP</b> | <b>-----THAS</b> | <b>AAAAAAAF</b>    | <b>NAST-----</b>    | <b>DKTSGFDAAS</b>  | <b>SKDDE----</b>  | <b>---PESPD</b>   | <b>LSNEADLAS</b>  |     |
| <b>alanine/glycine-rich region</b>          |                   |                   |                   |                  |                    |                     |                    |                   |                   |                   |     |
|                                             |                   | 510               | 520               |                  |                    |                     |                    |                   |                   |                   |     |
| CHICK BHLHE40                               | PLNLETKD--        | -----             | ---               |                  |                    |                     |                    |                   |                   |                   |     |
| HUMAN BHLHE40                               | PLNLETKD--        | -----             | ---               |                  |                    |                     |                    |                   |                   |                   |     |
| MOUSE BHLHE40                               | PLNLETKD--        | -----             | ---               |                  |                    |                     |                    |                   |                   |                   |     |
| DANRE BHLHE40                               | PLNLETKD--        | -----             | ---               |                  |                    |                     |                    |                   |                   |                   |     |
| CHICK BHLHE41                               | <b>EAEPAAAE--</b> | <b>---EPGA--</b>  | <b>EGP</b>        |                  |                    |                     |                    |                   |                   |                   |     |
| HUMAN BHLHE41                               | <b>PGNPSSAQE</b>  | <b>DPSQPGK--</b>  | <b>EAP</b>        |                  |                    |                     |                    |                   |                   |                   |     |
| MOUSE BHLHE41                               | <b>-VNPESSQ-E</b> | <b>DATQPAK--</b>  | <b>DAP</b>        |                  |                    |                     |                    |                   |                   |                   |     |
| DANRE BHLHE41                               | <b>ASEDHGSEID</b> | <b>TSHQQRNDN</b>  | <b>DGT</b>        |                  |                    |                     |                    |                   |                   |                   |     |

Figure S8: Alignment of BHLHE40 and BHLHE41 proteins of chicken, human, mouse and zebrafish. bHLH and orange domains, and alanine and glycine-rich region in the C-terminus are shown. Gene IDs for referenced amino acid sequences are as follows: CHICK BHLHE40 (416108), HUMAN BHLHE40 (8553), MOUSE BHLHE40 (20893), DANRE BHLHE40 (324413), CHICK BHLHE41 (101750689), HUMAN BHLHE41 (79365), MOUSE BHLHE41 (79362), DANRE BHLHE41 (563771).

Figure S9

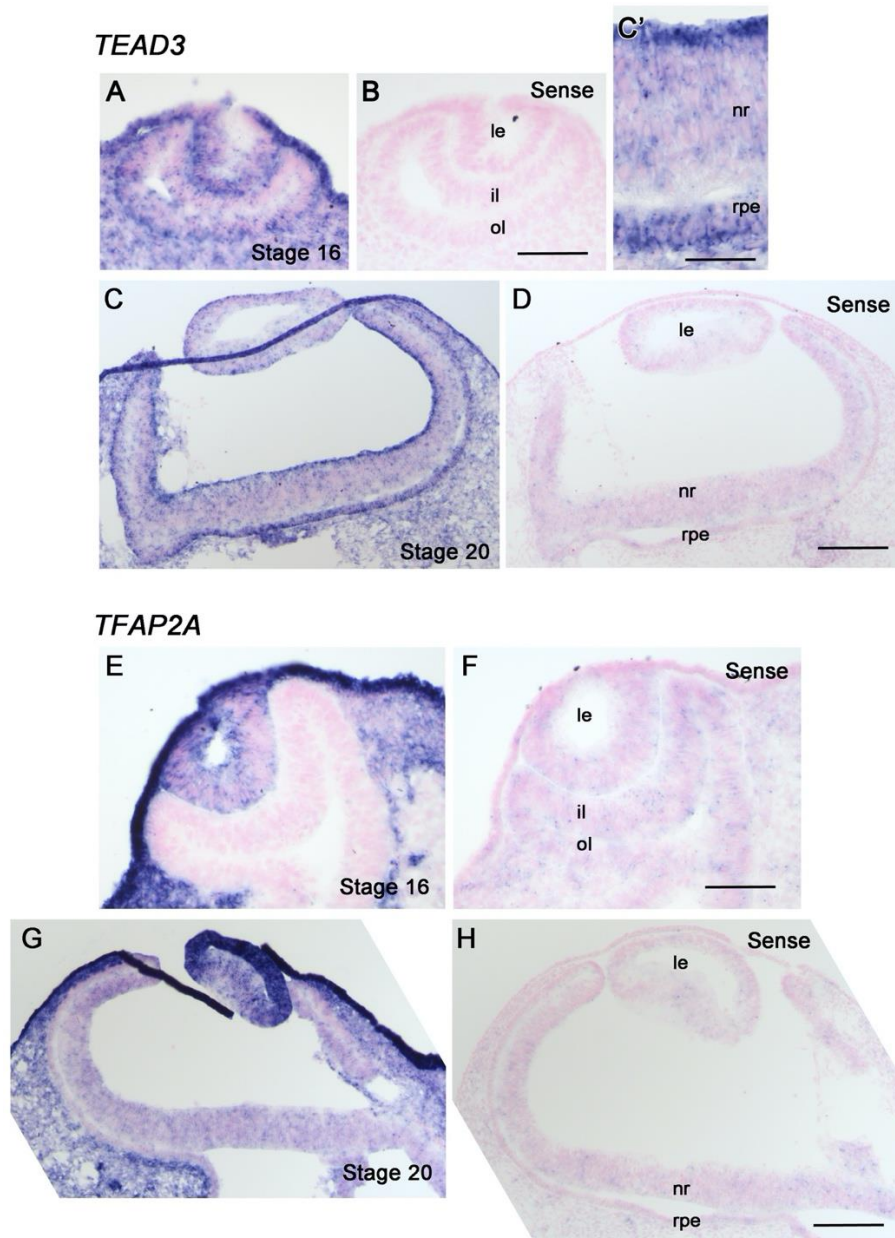

**Figure S9: Expression patterns of *TEAD3* and *TFAP2A* in the developing chicken eye.** (A-D) *TEAD3* is expressed in the surface ectoderm (SE) and developing eye at stages 16 (A,B) and 20 (C,C',D). (C') Enlarged view of the developing retina is shown. *TEAD3* mRNA signals are observed in the RPE as well as the basal vitread surface of the neural retina. (E-H) *TFAP2A* is expressed in the SE and lens vesicle. Results using sense control probes are shown in (B,D,F,H). il, inner layer of the optic cup; le, lens vesicle; nr, neural retina; ol, outer layer of the optic cup; rpe, developing RPE. Scale bars: 50  $\mu$ m (A,B,E,F), 100  $\mu$ m (C,D,G,H), 25  $\mu$ m (C').

**Figure S10**

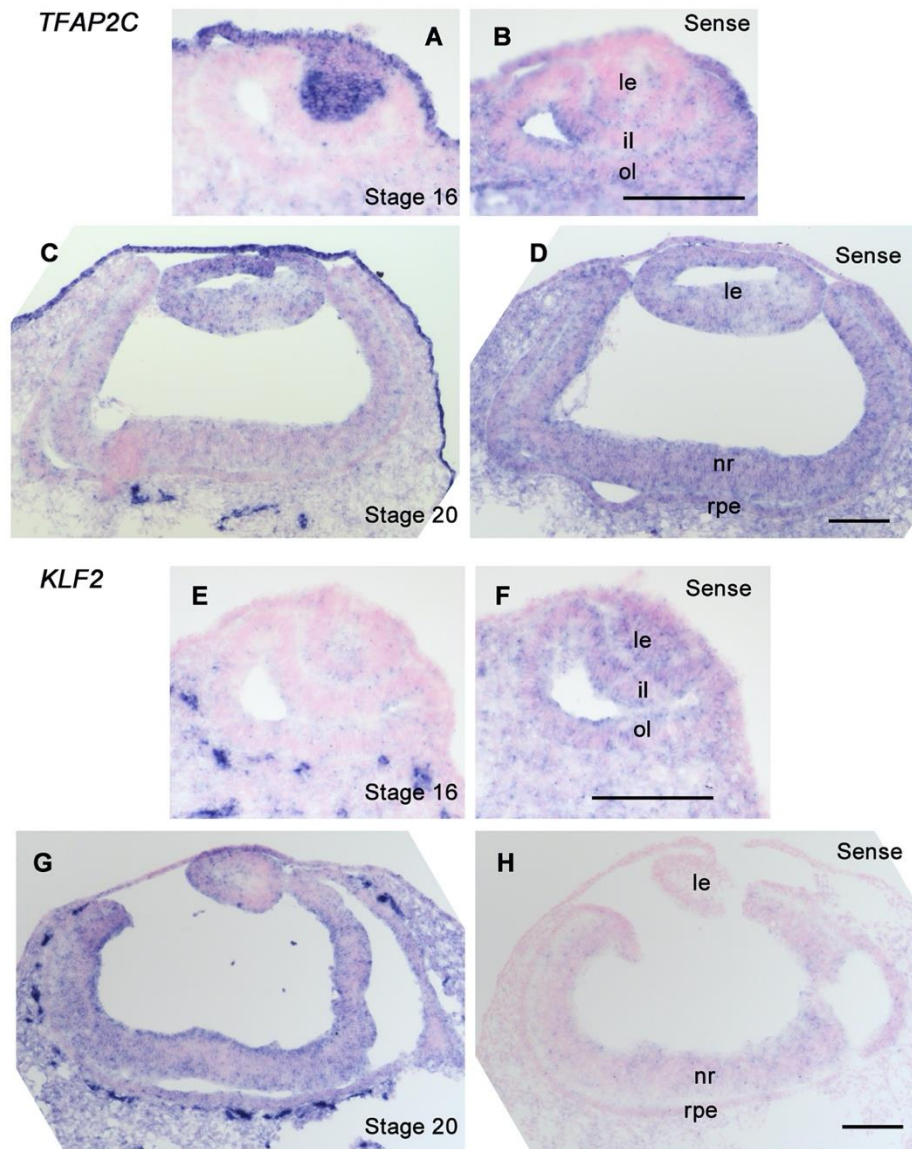

**Figure S10: Expression patterns of *TFAP2C* and *KLF2* in the developing chicken eye.** (A-D) *TFAP2C* is expressed in the surface ectoderm (SE), lens vesicle, and by a subset of cells in the periocular mesenchyme (C). (E-H) *KLF2* is expressed by a subset of cells in the periocular mesenchyme just beneath the RPE (G). il, inner layer of the optic cup; le, lens vesicle; nr, neural retina; ol, outer layer of the optic cup; rpe, developing RPE. Scale bars: 100  $\mu$ m.



**Figure S11**

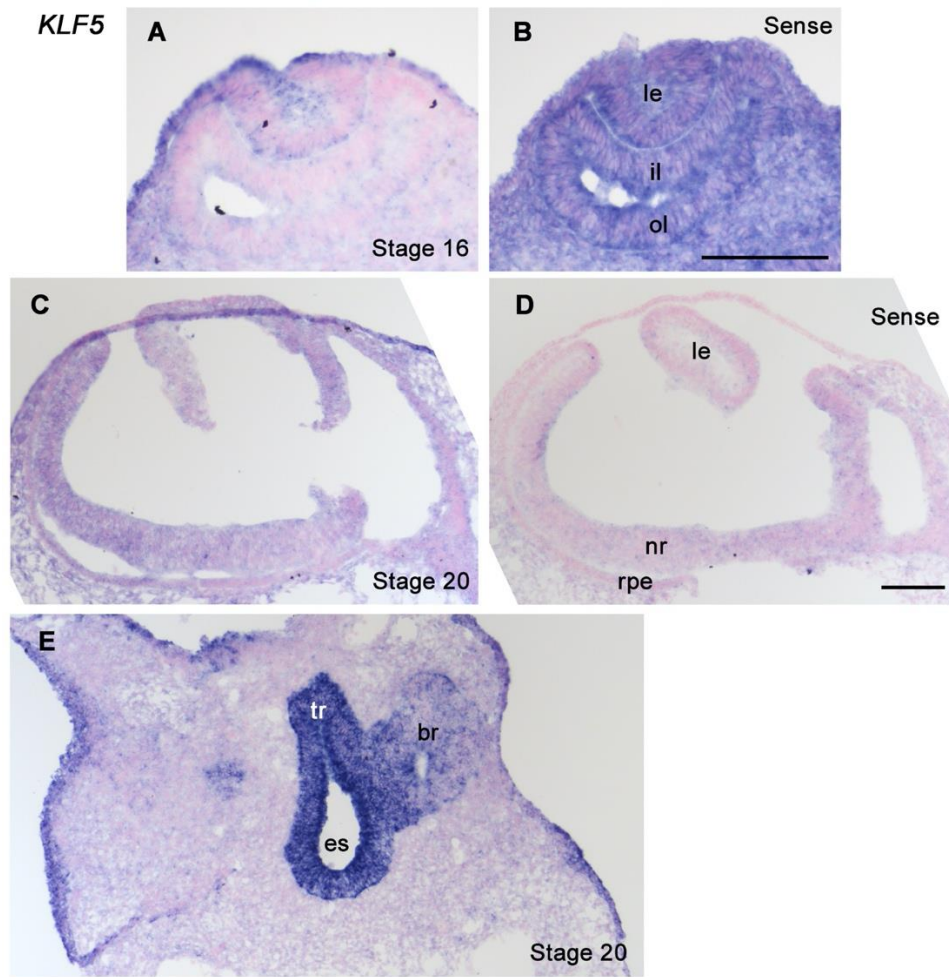

**Figure S11: Expression pattern of *KLF5* in the developing chicken eye.** *KLF5* is expressed in the surface ectoderm of the developing eye (A,C) and outside the eye (E) as well as the endoderm of developing trachea, bronchus and esophagus. br, bronchus; es, esophagus; il, inner layer of the optic cup; le, lens vesicle; nr, neural retina; ol, outer layer of the optic cup; rpe, developing RPE; tr, trachea. Scale bars: 100  $\mu$ m.



**Table S1: PCR primer sequences used in this study.**

| Gene name                                               | Amplicon size (bp) | Primer name                                      | Primer/DNA sequences (5'→3')                                                                                               | Purpose                                                                                            |
|---------------------------------------------------------|--------------------|--------------------------------------------------|----------------------------------------------------------------------------------------------------------------------------|----------------------------------------------------------------------------------------------------|
| <i>chicken</i><br><i>BHLHE40</i><br>( <i>cBHLHE40</i> ) | 1193               | cBhlhe40 forward                                 | CTGACCCCTGAAGCAGCTCAA                                                                                                      | donating a template cDNA to synthesize riboprobes                                                  |
|                                                         |                    | cBhlhe40 reverse                                 | GACACATGGCAGCTACTGA                                                                                                        |                                                                                                    |
| <i>cBHLHE40</i>                                         | 1206               | cBhlhe40 full forward<br>cBhlhe40 full reverse   | ATGGAGCGCATCCCGAG<br>TTAGTCTTTGTTTTCCAAAGTTCAC                                                                             | donating a full-coding sequence for <i>cBHLHE40</i>                                                |
| <i>cBHLHE40</i>                                         | 1252               | Bhlhe40_Fw<br>Bhlhe40_Rv                         | TAGCGTTTAAACTTAACTCTGCACATGCGAGCGATCCCGACG<br>ACGGCGCCCTCAGCTACGCTAGTCTTGTGTTTCCAAAGTTCAC                                  | insertion of <i>cBHLHE40</i> into pCAGGS vector                                                    |
| <i>cBHLHE40</i>                                         | 1279               | Bhlhe40_pCAG_Fw<br>Bhlhe40_HA_pCAG_Rv            | CGGGCTTAAACTTAAGCTTGGCCACATAGGACGGCATC<br>CGGCGCCCTCTAGACTCTAGCAGCTTACGCATAATCCGGCACATACAGCATAGTCTTTGTTTCCAAAGTT           | insertion of <i>cBHLHE40</i> into pCAGGS vector with HA-tag                                        |
| <i>delta_basic</i><br><i>cBHLHE40</i>                   | 194                | ggaBhlhe40_delbasic_Fw<br>ggaBhlhe40_delbasic_Rv | AGCAGCGAGCAGCAGCAAGATAGGATCAACAGAGTGC<br>GCACCTGTGTATCTATCTCTGCTCTGCTCGCTCT                                                | amplification of N terminal portion of HA-tagged cBHLHE40 before basic region                      |
| <i>delta_basic</i><br><i>cBHLHE40</i>                   | 1076               | pCAG_fw_HindIII<br>pCAG_Rv_XhoI                  | ACGCTTTAAACTTAAGCTTC<br>CGGCGCCCTCTAGACTCGAGC                                                                              | amplification of C terminal portion of HA-tagged cBHLHE40 after basic region                       |
| <i>acidic</i><br><i>extension</i><br><i>cBHLHE40</i>    | 106                | a-Bhlhe40_ins_Fw_pCAG<br>a-Bhlhe40_ins_Rv        | AGCCTTTAAACTTAAGCTTGGCCACATGGCAATCAATGACTGGA<br>AACTCTTCAGACTCTTCTCATCTCTCTCATCGGGGTCTCTCCCATCTGCTGCTGACCTCCAGTCATGTGCGCAT | acidic extension sequence for replacement of N terminal portion of cBHLHE40 including basic region |
| <i>acidic</i><br><i>extension</i><br><i>cBHLHE40</i>    | 1068               | a-Bhlhe40_Fw<br>pCAG_Rv_XhoI                     | AGAACAGCTGGAAGAGTTGGAGATGCATGCCACGCTC<br>CGGCGCCCTCTAGACTCGAGC                                                             | amplification of C terminal portion of HA-tagged cBHLHE40 after basic region                       |
| <i>chicken</i><br><i>BHLHE41</i>                        | 1776               | gga_bhlhe41_Fw<br>gga_bhlhe41_Rv                 | CCCGCGGATCCCGGAAGC<br>CGACTCGGCGCGCCCATAA                                                                                  |                                                                                                    |
| <i>chicken</i><br><i>TEAD3</i>                          | 1299               | gga_lead3_Fw<br>gga_lead3_Rv                     | ATGGACAAGAGCCCTGGACAATGACGGCGAG<br>CTAGCTCTTCACAACTTGTAGACATCATG                                                           |                                                                                                    |
| <i>chicken</i><br><i>TFAP2A</i>                         | 1640               | gga_flap2a_Fw<br>gga_flap2a_Rv                   | GGGATCGGAGCCCTCTCCCGC<br>CTGGCTCCGTCGCCCTGTTT                                                                              |                                                                                                    |
| <i>chicken</i><br><i>TFAP2C</i>                         | 1347               | gga_flap2c_Fw<br>gga_flap2c_Rv                   | ATGTTGTGAAACTGGCACAACGTCAAG<br>TTACTCTCTGCTGTGTCCATTATTATGAT                                                               | donating template cDNAs to synthesize riboprobes                                                   |
| <i>chicken</i><br><i>KLF2</i>                           | 1536               | gga_klf2_Fw<br>gga_klf2_Rv                       | CCATGGCGCTGACGGATACCA<br>AACACCGAGCTACAGCAACGCTC                                                                           |                                                                                                    |
| <i>chicken</i><br><i>KLF5</i>                           | 1504               | gga_klf5_Fw<br>gga_klf5_Rv                       | GAGCAATGACAGCCCGGA<br>GCCTCGGCAACAACTCTGGCT                                                                                |                                                                                                    |

**Table S2: Antibodies used in this study.**

| Antibody                        |                   | Vender                   | Catalog# | Dilution             | Final concentration | Diluted in                               | Antigen retrieval              | Antibody concentration |
|---------------------------------|-------------------|--------------------------|----------|----------------------|---------------------|------------------------------------------|--------------------------------|------------------------|
| Anti-OTX2                       | Rabbit polyclonal | abcam                    | ab21990  | 1000                 | 1 ug/mL             | IMMUNO SHOT immunostaining, Fine         | None                           | 1 mg/mL                |
| Anti-VSX2                       | Sheep polyclonal  | Ex Alpha                 | X1180p   | 400                  | 0.25 ug/mL          | IMMUNO SHOT immunostaining, Mild         | in TE (pH 8.0) at 98°C, 45 min | 1 mg/mL                |
| Anti-Cleaved caspase 3          | Rabbit monoclonal | R & D systems            | MAB835   | 1000                 | 0.5 ug/mL           | IMMUNO SHOT immunostaining, Fine         | None                           | 0.5 mg/mL              |
| Anti-HA                         | Rat monoclonal    | Roche                    | ROAHAHA  | 200 or 400           | 0.5 or 0.25 ug/mL   | IMMUNO SHOT immunostaining, Fine or Mild | None                           | 0.1 mg/mL              |
| Anti-OTX2 + Anti-HA             |                   |                          |          | 1000(OTX2), 200 (HA) |                     | IMMUNO SHOT immunostaining, Fine         | None                           |                        |
| Anti-VSX2 + Anti-HA             |                   |                          |          | 400(VSX2), 400 (HA)  |                     | IMMUNO SHOT immunostaining, Mild         | in TE (pH 8.0) at 98°C, 45 min |                        |
| Anti-sheep IgG Alexa Fluor 488  | Donkey polyclonal | Thermo Fisher Scientific | A-11015  | 1000                 | 2 ug/mL             | 1% BSA, 0.1% Triton-X100 in PBS          | Not applicable                 | 2 mg/mL                |
| Anti-rat IgG Alexa Fluor 488    | Goat polyclonal   | Thermo Fisher Scientific | A-11006  | 1000                 | 2 ug/mL             | 1% BSA, 0.1% Triton-X100 in PBS          |                                | 2 mg/mL                |
| Anti-rat IgG Alexa Fluor 568    | Donkey polyclonal | abcam                    | ab175708 | 1000                 | 2 ug/mL             | 1% BSA, 0.1% Triton-X100 in PBS          | Not applicable                 | 2 mg/mL                |
| Anti-rabbit IgG Alexa Fluor 647 | Goat polyclonal   | abcam                    | ab150087 | 1000                 | 2 ug/mL             | 1% BSA, 0.1% Triton-X100 in PBS          | Not applicable                 | 2 mg/mL                |
